# Supplementary material for: A novel telomere-related genes model for predicting prognosis and treatment responsiveness in diffuse large B-cell lymphoma
Source: Aging (Albany NY). 2023 Nov 15;15(22):12927–51. doi: 10.18632/aging.205211 (PMC10713390; doi:10.18632/aging.205211)
Supplement: Supplementary Figures [file aging-15-205211-s001.pdf]

## SUPPLEMENTARY FIGURES

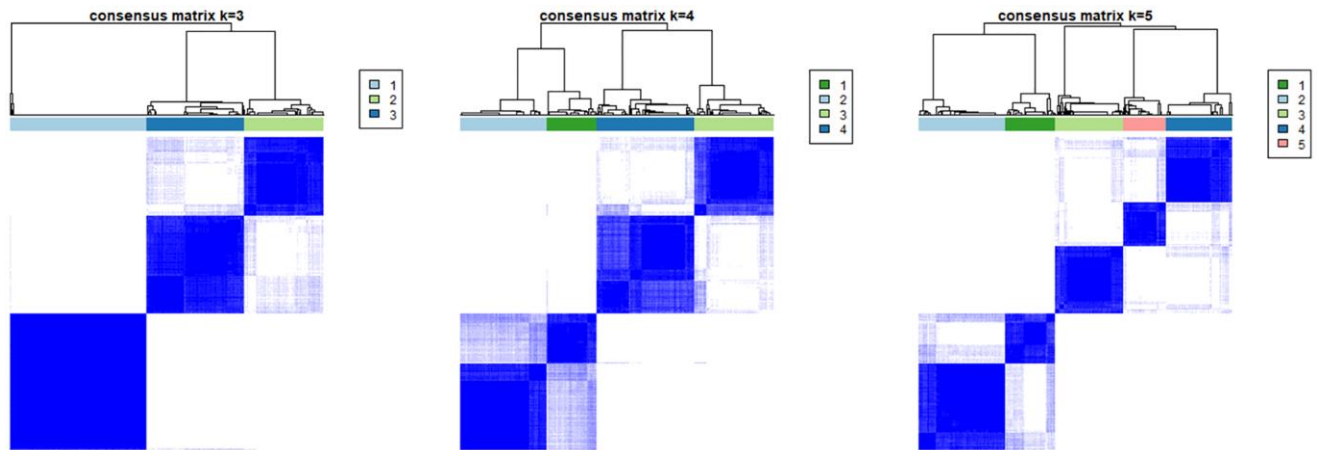

**Supplementary Figure 1. The consensus matrix by cluster analysis based on TRGs.** TRGs-based consensus clustering heatmap from 412 DLBCL samples of GSE10846 ( $k = 3-5$ ).

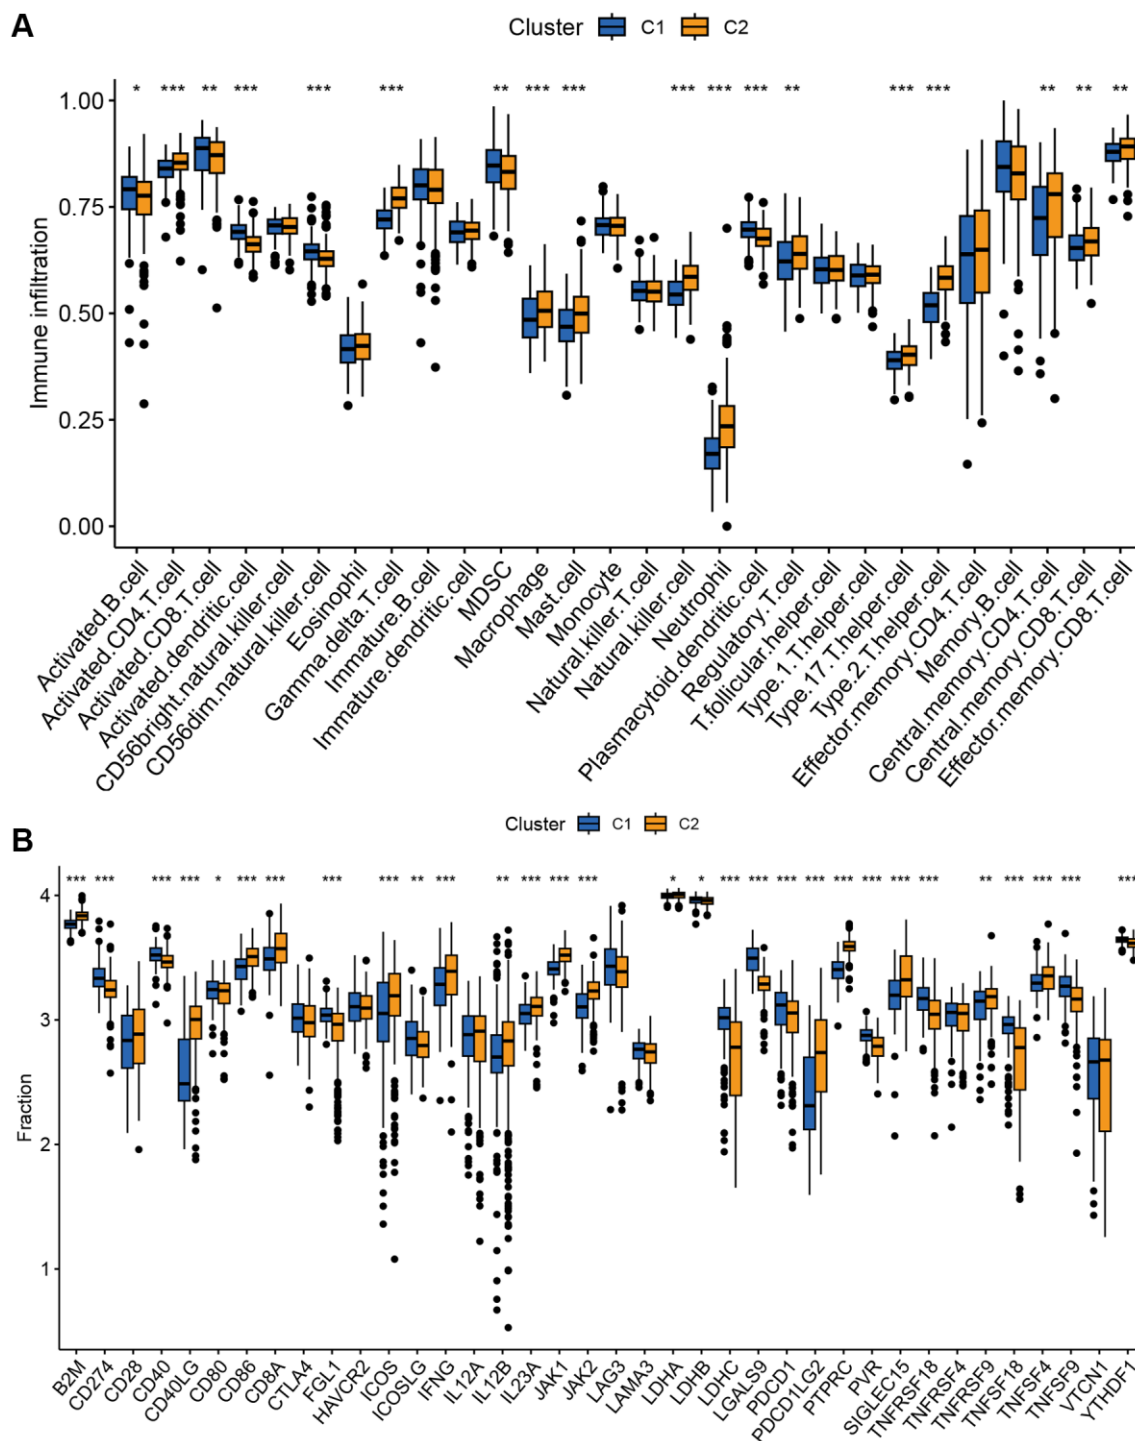

**Supplementary Figure 2. Different immune profiles between two clusters.** (A, B) The differences of (A) 28 immune cells and (B) 38 immune checkpoints between two clusters by ssGSEA (\* $p < 0.05$ ; \*\* $p < 0.01$ ; and \*\*\* $p < 0.001$ ).

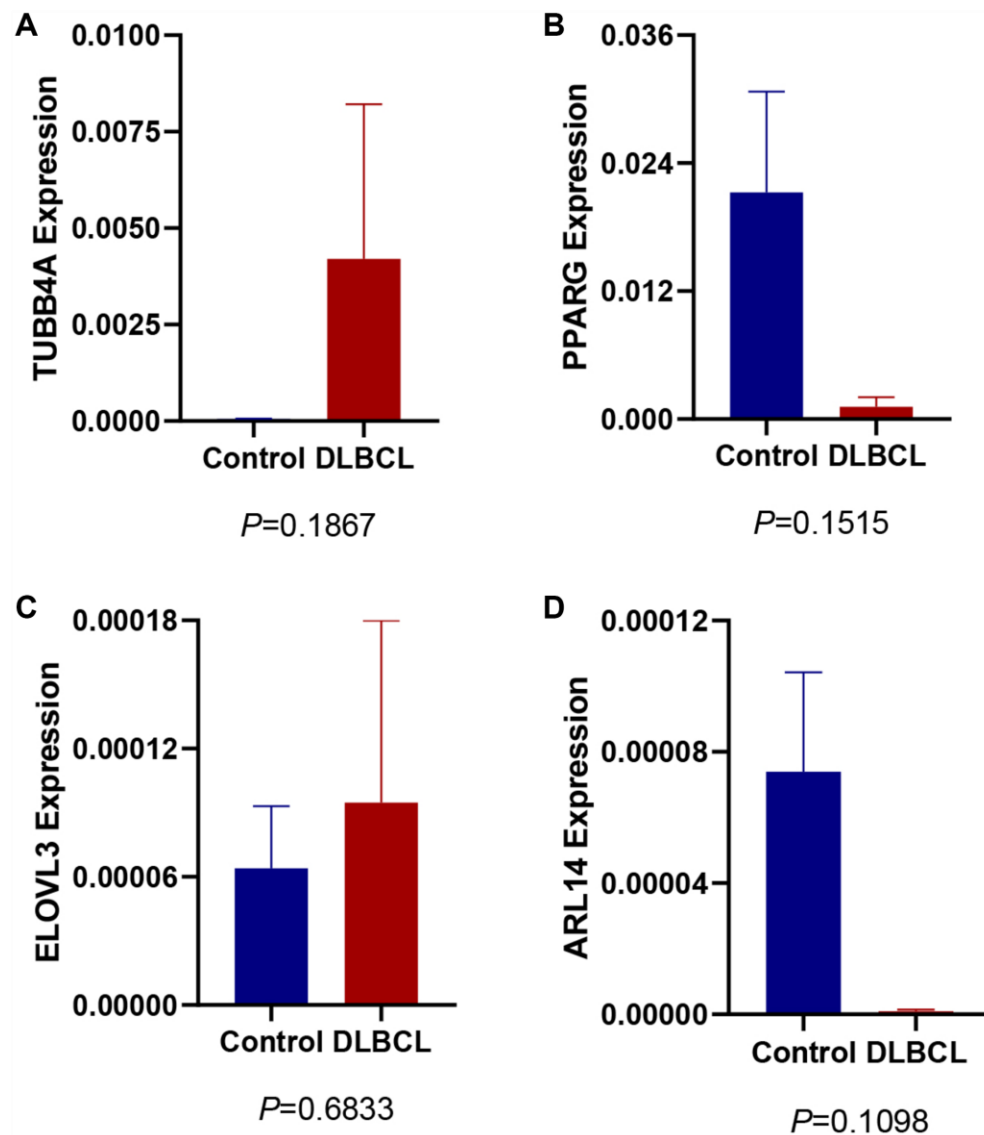

**Supplementary Figure 3. Expression evaluation of other candidate TRGs in the model.** (A–D) The expression of (A) TUBB4A (B) PPARG, (C) ELOVL3 and (D) ARL14 in DLBCL group and control group.

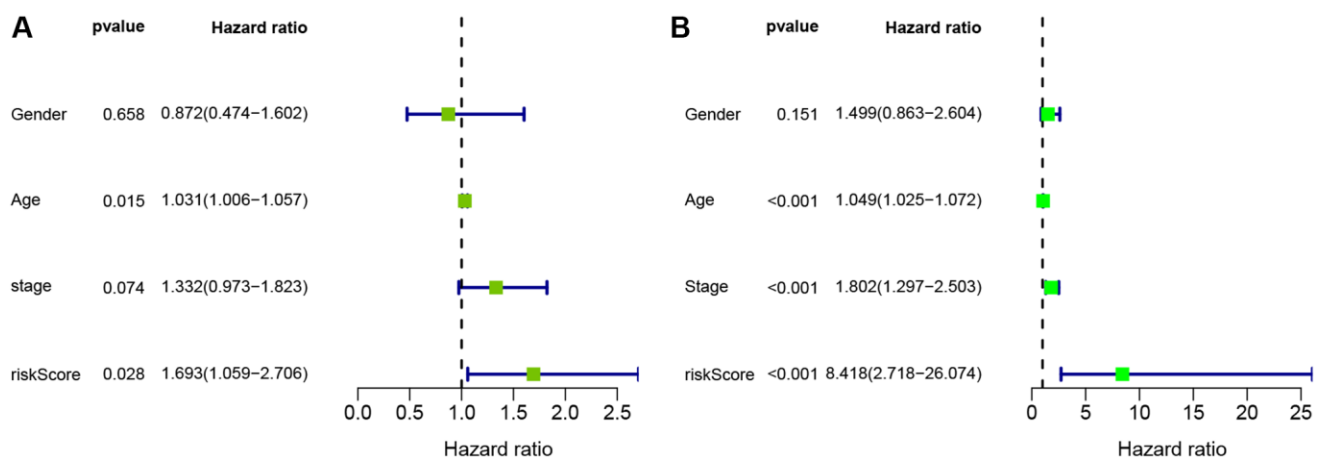

**Supplementary Figure 4. Univariate Cox regression analysis of the TRGs score and clinical features.** (A, B) Univariate Cox regression analysis of TRGs score and clinical features in (A) GSE10846 testing cohort and (B) GSE87371 cohort.

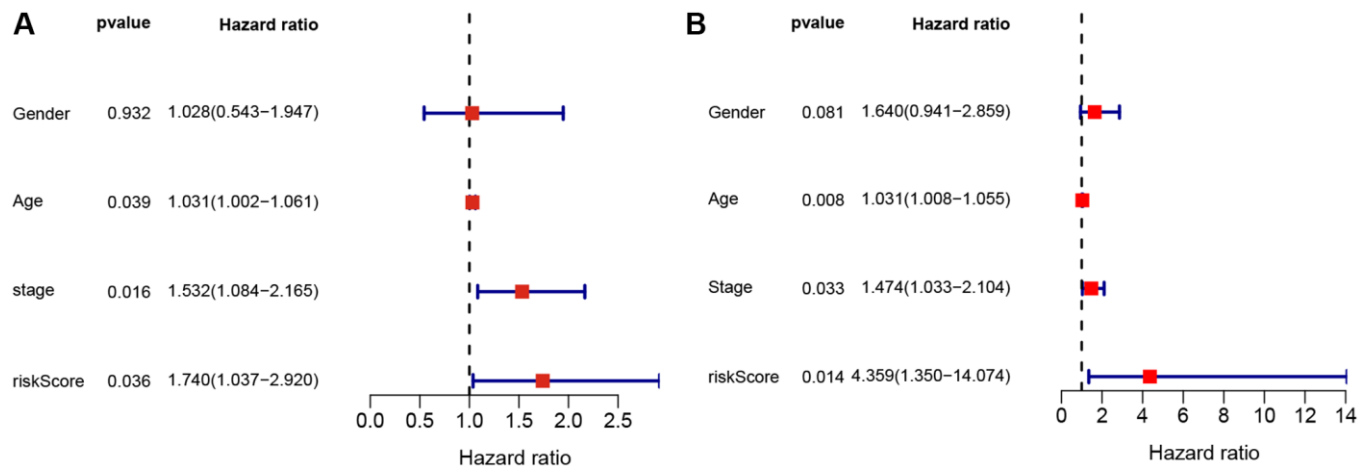

**Supplementary Figure 5. Multivariate Cox regression analysis of the TRGs score and clinical features.** (A, B) Multivariate Cox regression analysis of TRGs score and clinical features in (A) GSE10846 testing cohort and (B) GSE87371 cohort.
